# Supplementary material
Source: PubMed Central journal article supplement (PMC8821951)
Supplement: mmc1.pdf [file mmc1.pdf]

YMTHE, Volume 30

## **Supplemental Information**

**Type I IFNs repolarized a CD169<sup>+</sup>  
macrophage population with anti-tumor  
potentials in hepatocellular carcinoma**

**Jing Liao, Dan-Ni Zeng, Jin-Zhu Li, Qiao-Min Hua, Chun-Xia Huang, Jing Xu, Chong Wu, Limin Zheng, Wei-Ping Wen, and Yan Wu**

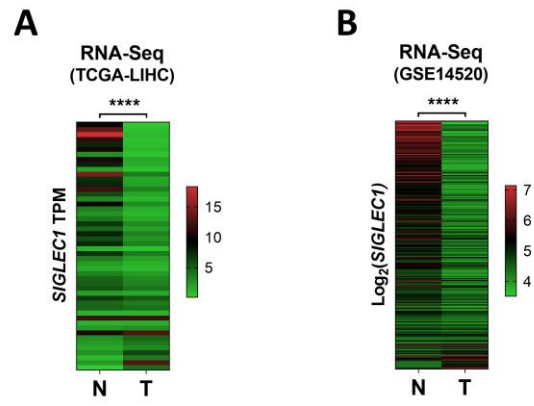

**Supplementary Figure 1. *SIGLEC1* mRNA expression in HCC tissues**

(A) *SIGLEC1* mRNA expression of 50 paired non-tumor (N) and tumor (T) liver hepatocellular carcinoma (HCC) samples from TCGA data set. (B) *SIGLEC1* mRNA expression of 234 paired non-tumor and tumor HCC samples from GSE14520 data set.

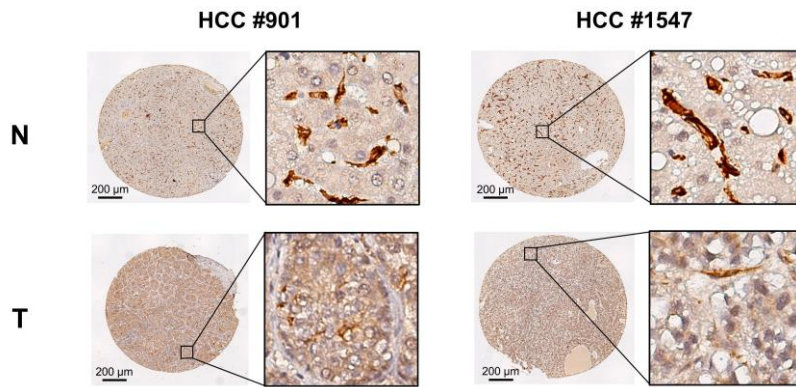

**Supplementary Figure 2. Representative immunohistochemical staining of CD169 in HCC tissue microarray**

Representative images of immunohistochemistry analyses of CD169 (strong brown staining) in HCC nontumoral and tumoral tissues.

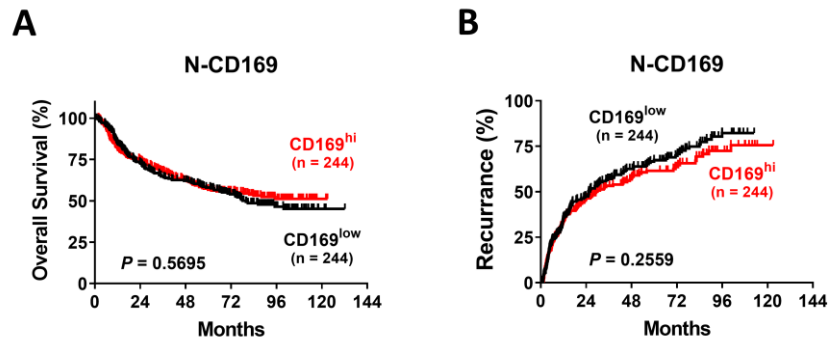

**Supplementary Figure 3. Level of non-tumor infiltrating CD169<sup>+</sup> M $\phi$  is not associated with disease progression**

**(A-B)** 488 HCC patients were divided into two groups according to the median of the CD169<sup>+</sup> cells density in nontumor regions. The cumulative overall survival (A) and recurrence (B) was calculated using the Kaplan-Meyer method and then analyzed with the log-rank test.

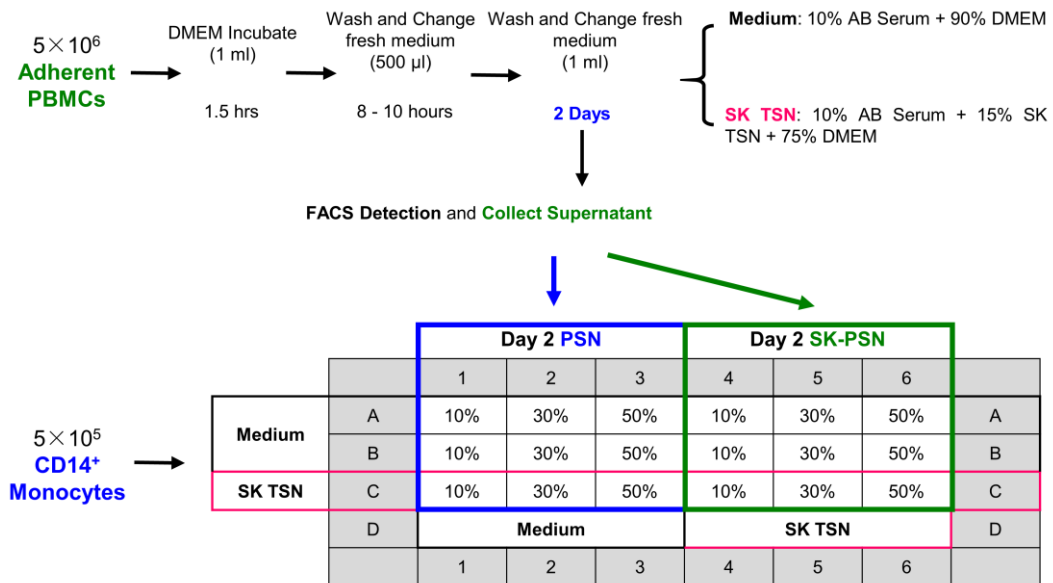

**Supplementary Figure 4. Procedure of collecting SK TCS -treated PBMCs condition supernatants**

PBMCs enrichment by adherent treatment method were precultured with medium or SK TCS, and supernatants (PSN or SK-PSN) were collected at 48 hours. Thereafter, CD14<sup>+</sup> monocytes were isolated with magnetic bead sorting, and cultured with the indicated supernatants for 48 hours.

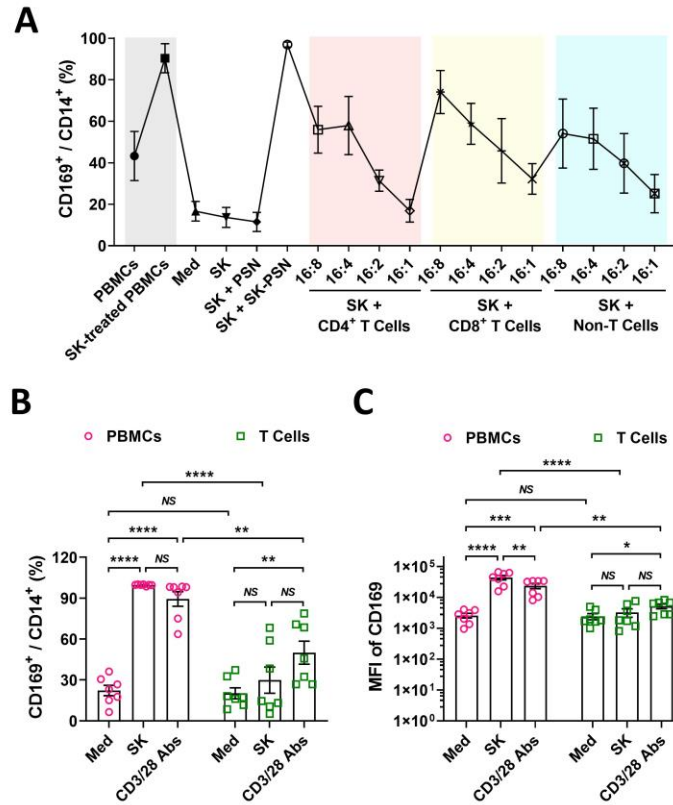

**Supplementary Figure 5. Activated T lymphocytes-derived soluble factors are responsible for CD169 induction on monocytes**

(A) Dark region: PBMCs enrichment by adherent method were cultured with medium or SK TCS. Other regions: monocytes were isolated from PBMCs of healthy donor using CD14 beads, and CD4<sup>+</sup> T cells (CD14<sup>+</sup>CD19<sup>-</sup>CD4<sup>+</sup>CD8<sup>-</sup>), CD8<sup>+</sup> T cells (CD14<sup>-</sup>CD19<sup>-</sup>CD4<sup>+</sup>CD8<sup>+</sup>), non-T cells (CD14<sup>-</sup>CD19<sup>-</sup>CD4<sup>-</sup>CD8<sup>-</sup>) were sorted by flow cytometry. CD14<sup>+</sup> monocytes ( $5 \times 10^5$ ) were cocultured with or without sorted cells in various condition. Two days later, the ratio of CD169<sup>+</sup> cells in CD14<sup>+</sup> cells were determined by flow cytometry, n = 5. (B-C) PBMCs ( $5 \times 10^6$  cells/ml) enrichment by adherent method were pretreated in the presence of medium, SK TCS (30%), or CD3/28 antibodies (2  $\mu$ g/ml anti-CD3 antibody and 4  $\mu$ g/ml anti-CD28 antibody), respectively. CD3<sup>+</sup> T cells ( $1 \times 10^6$  cells/ml) sorted by flow cytometry were pretreated in the presence of medium (40 U/ml IL-2), SK TCS (30% TCS and 40 U/ml IL-2), or CD3/28 antibodies (40 U/ml IL-2, 2  $\mu$ g/ml anti-CD3 antibody coating, and 4  $\mu$ g/ml anti-CD28 antibody), respectively. Supernatants were collected at 2 days later, and CD14<sup>+</sup> monocytes ( $5 \times 10^5$ ) were cocultured with 30% indicated supernatants. Two days later, the ratio of CD169<sup>+</sup> cells in CD14<sup>+</sup> cells (b) and the MFI of CD169 on CD14<sup>+</sup> cells (c) were determined by flow cytometry, n = 7. Data represent mean  $\pm$  SEM; NS, no significant; \* $P < 0.05$ ; \*\* $P < 0.01$ ; \*\*\*\* $P < 0.0001$ ; Two-way ANOVA multiple comparisons (b and c).

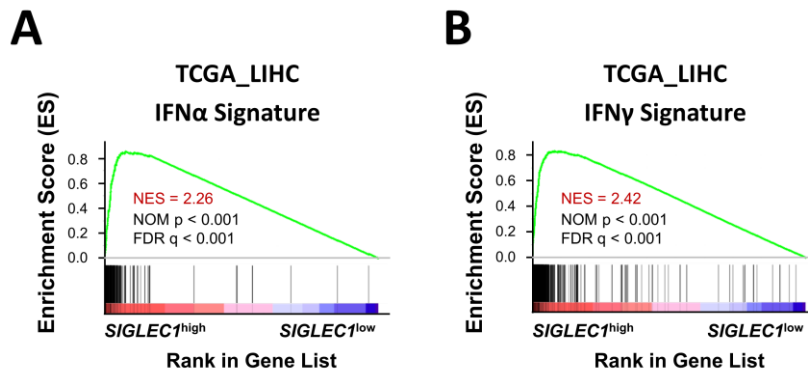

### Supplementary Figure 6. CD169 reflects IFN signatures in human HCC

(A-B) GSEA of IFN $\alpha$  signature (A) and IFN $\gamma$  signature (B) in 183 *SIGLEC1*<sup>high</sup> and 182 *SIGLEC1*<sup>low</sup> counterparts from TCGA data set. The enrichment scores, NOM p values and FDR q values were calculated by GSEA with weighted enrichment statistics and ratio of classes for the metric as input parameters.

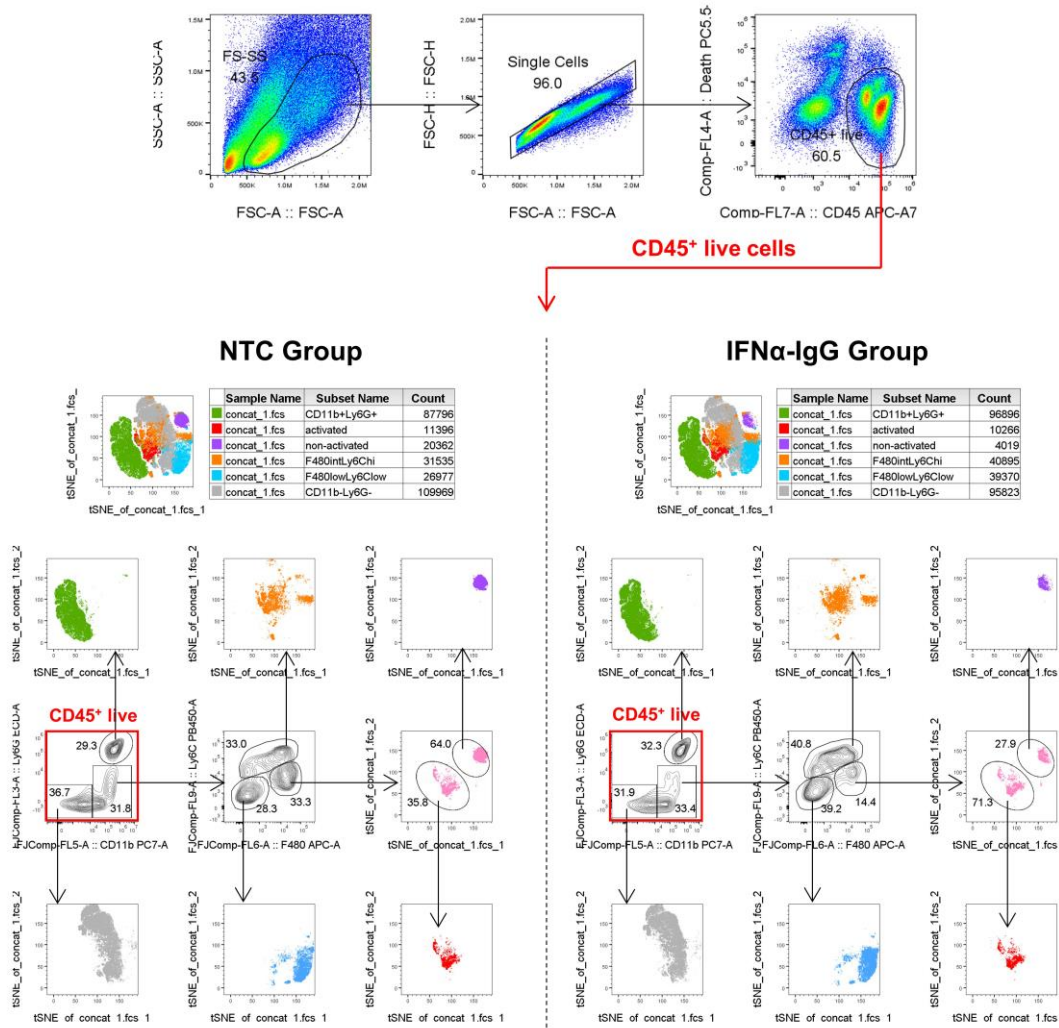

### Supplementary Figure 7. Gating strategies

WT C57B/6 mice were injected subcutaneously with  $1 \times 10^6$  Hepa1-6 cells. Then, 10  $\mu$ g of IFN $\alpha$ -IgG or PBS (no treatment control, NTC) was administered intravenously on day 8, and tumor tissues were collected on day 11, n = 10. Multiparametric flow cytometry analysis was performed of live immunocytes isolated from freshly dissociated tumor specimens.



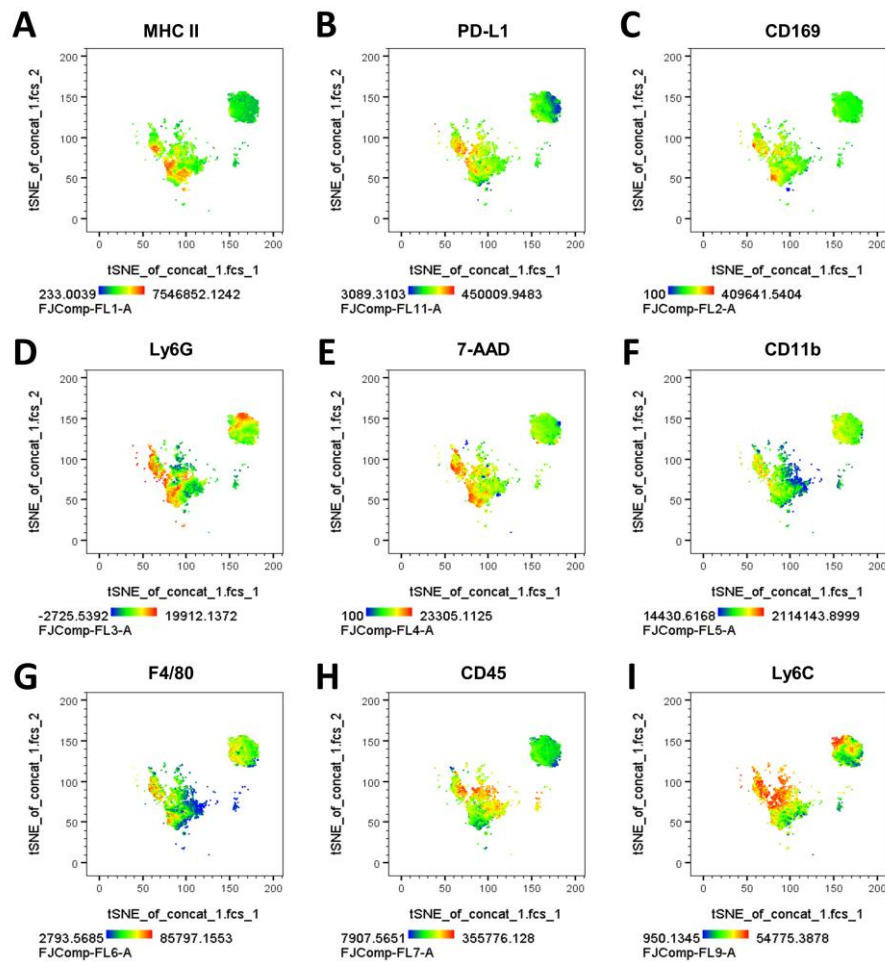

**Supplementary Figure 8. Heatmap of various molecular expression between F4/80<sup>hi</sup>Ly6C<sup>int</sup> – act and F4/80<sup>hi</sup>Ly6C<sup>int</sup> – non-act clusters**

(A-I) WT C57B/6 mice were injected subcutaneously with  $1 \times 10^6$  Hepa1-6 cells. Then, 10  $\mu$ g of IFN $\alpha$ -IgG or PBS (no treatment control, NTC) was administered intravenously on day 8, and tumoral tissues were collected on day 11, n = 10. tSNE plot was displayed for all samples, exhibiting the expression of indicated makers on F4/80<sup>hi</sup>Ly6C<sup>int</sup> cluster.

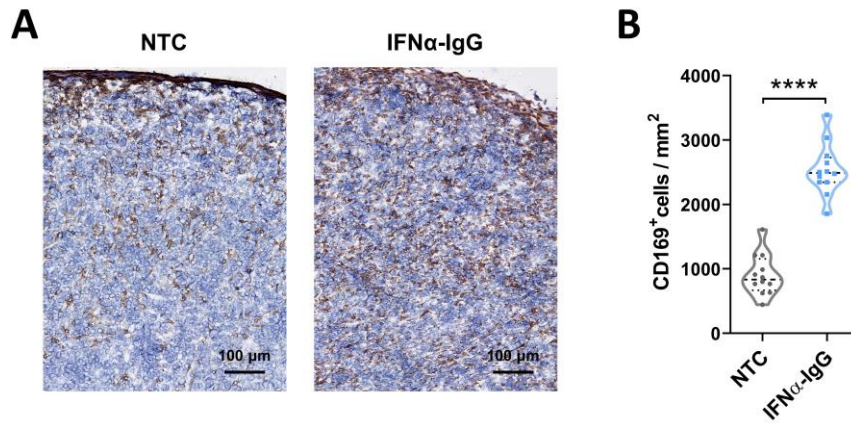

**Supplementary Figure 9. Increased CD169<sup>+</sup> Mφ infiltration after IFN $\alpha$ -IgG therapy**

(A-B) WT C57B/6 mice were injected subcutaneously with  $1 \times 10^6$  Hepa1-6 cells. Then, 10  $\mu$ g of IFN $\alpha$ -IgG was administered intravenously on day 10, 12 and 14. Tumor tissues were collected on day 21, and immunohistochemical staining of CD169 in frozen tumor sections was performed,  $n = 3$ . (A) Representative immunohistochemical staining of CD169 in frozen tumor sections, scale bar = 100  $\mu$ m. (B) The density of CD169<sup>+</sup> cells. Four different views of each section were randomly selected for counting. Data represent violin plot; \*\*\*\* $P < 0.0001$ ; unpaired Student's  $t$  test.

## Supplementary Tables

**Supplementary Table 1. Correlation between clinicopathological parameters and the density of CD169<sup>+</sup> cells and CD8<sup>+</sup> cells**

| Characteristics                    | No. CD169 <sup>+</sup> (%) |                   |                    | No. CD8 <sup>+</sup> (%) |                   |                    |
|------------------------------------|----------------------------|-------------------|--------------------|--------------------------|-------------------|--------------------|
|                                    | Low<br>(No. 259)           | High<br>(No. 229) | <i>P</i><br>value* | Low<br>(No. 230)         | High<br>(No. 257) | <i>P</i><br>value* |
| <b>Gender</b>                      |                            |                   |                    |                          |                   |                    |
| female                             | 34 (6.97)                  | 22 (4.51)         | 0.223              | 33 (6.78)                | 23 (4.72)         | 0.062              |
| male                               | 225 (46.11)                | 207 (42.42)       |                    | 197 (40.45)              | 234 (48.05)       |                    |
| <b>Age, year</b>                   |                            |                   |                    |                          |                   |                    |
| ≤ 50                               | 144 (29.51)                | 95 (19.47)        | <b>0.002</b>       | 125 (25.67)              | 114 (23.41)       | <b>0.028</b>       |
| > 50                               | 115 (23.57)                | 134 (27.46)       |                    | 105 (21.56)              | 143 (29.36)       |                    |
| <b>HBsAg</b>                       |                            |                   |                    |                          |                   |                    |
| negative                           | 26 (5.33)                  | 25 (5.12)         | 0.752              | 22 (4.52)                | 29 (5.95)         | 0.536              |
| positive                           | 233 (47.75)                | 204 (41.08)       |                    | 208 (42.71)              | 228 (46.82)       |                    |
| <b>AFP, ng/mL</b>                  |                            |                   |                    |                          |                   |                    |
| ≤ 25                               | 78 (15.98)                 | 128 (26.23)       | <b>&lt; 0.001</b>  | 73 (14.99)               | 105 (21.56)       | <b>0.037</b>       |
| > 25                               | 181 (37.09)                | 101 (20.70)       |                    | 157 (32.24)              | 152 (31.21)       |                    |
| <b>ALT, U/L</b>                    |                            |                   |                    |                          |                   |                    |
| ≤ 40                               | 114 (23.36)                | 132 (27.05)       | <b>0.003</b>       | 132 (27.10)              | 144 (29.57)       | 0.762              |
| > 40                               | 145 (29.71)                | 97 (19.88)        |                    | 98 (20.12)               | 113 (23.20)       |                    |
| <b>Cirrhosis<sup>†</sup></b>       |                            |                   |                    |                          |                   |                    |
| absent                             | 49 (10.21)                 | 44 (9.17)         | 0.997              | 40 (8.35)                | 53 (11.06)        | 0.394              |
| present                            | 204 (42.50)                | 183 (38.13)       |                    | 185 (38.62)              | 201 (41.96)       |                    |
| <b>Differentiation<sup>†</sup></b> |                            |                   |                    |                          |                   |                    |
| I+II                               | 203 (41.86)                | 179 (36.91)       | 0.897              | 187 (38.64)              | 194 (40.08)       | 0.094              |
| III+IV                             | 54 (11.13)                 | 49 (10.10)        |                    | 41 (8.47)                | 62 (12.81)        |                    |
| <b>Tumour multiplicity</b>         |                            |                   |                    |                          |                   |                    |
| single                             | 182 (37.30)                | 179 (36.68)       | <b>0.047</b>       | 170 (34.91)              | 190 (39.01)       | 0.997              |
| multiple                           | 77 (15.78)                 | 50 (10.25)        |                    | 60 (12.32)               | 67 (13.76)        |                    |
| <b>Tumour size, cm</b>             |                            |                   |                    |                          |                   |                    |
| ≤ 5                                | 114 (23.36)                | 114 (23.36)       | 0.203              | 105 (21.56)              | 123 (25.26)       | 0.626              |
| > 5                                | 145 (29.71)                | 115 (23.57)       |                    | 125 (25.67)              | 134 (27.52)       |                    |
| <b>BCLC</b>                        |                            |                   |                    |                          |                   |                    |
| A                                  | 154 (31.56)                | 157 (32.17)       | <b>0.038</b>       | 144 (29.57)              | 166 (34.09)       | 0.65               |
| B+C                                | 105 (21.52)                | 72 (14.75)        |                    | 86 (17.66)               | 91 (18.69)        |                    |
| <b>TNM stage</b>                   |                            |                   |                    |                          |                   |                    |
| I+II                               | 168 (34.43)                | 179 (36.68)       | <b>0.001</b>       | 161 (33.06)              | 185 (37.99)       | 0.63               |
| III+IV                             | 91 (18.65)                 | 50 (10.25)        |                    | 69 (14.17)               | 72 (14.78)        |                    |

\* $\chi^2$  test. Significant *P* values (< 0.05) are shown in bold.

<sup>†</sup>Data was missing in these variables for some patients.

**Supplementary Table 2. Univariate and multivariate analyses of factors associated with overall survival for HCC**

| Variables                                      | Overall Survival    |              |                   |                       |              |                   |
|------------------------------------------------|---------------------|--------------|-------------------|-----------------------|--------------|-------------------|
|                                                | Univariate Analysis |              |                   | Multivariate Analysis |              |                   |
|                                                | HR                  | 95% CI       | P value           | HR                    | 95% CI       | P value           |
| Gender (female vs. male)                       | 0.735               | 0.513-1.054  | 0.095             |                       |              |                   |
| Age, years ( $\leq 55$ vs. $> 55$ )            | 0.957               | 0.737-1.243  | 0.744             |                       |              |                   |
| HBsAg (negative vs. positive)                  | 0.996               | 0.652-1.521  | 0.985             |                       |              |                   |
| AFP, ng/mL ( $\leq 25$ vs. $> 25$ )            | 1.779               | 1.333-2.374  | <b>&lt; 0.001</b> | 1.387                 | 1.023-1.880  | <b>0.035</b>      |
| ALT, U/L ( $\leq 40$ vs. $> 40$ )              | 1.335               | 1.029-1.733  | <b>0.030</b>      | 1.159                 | 0.883-1.521  | 0.287             |
| Cirrhosis <sup>†</sup> (absent vs. present)    | 1.907               | 1.298-2.800  | <b>0.001</b>      | 2.063                 | 1.373-3.100  | <b>&lt; 0.001</b> |
| Child-Pugh score (A vs. B)                     | 0.396               | 0.234-0.669  | <b>0.001</b>      | 0.460                 | 0.256-0.829  | <b>0.010</b>      |
| Differentiation <sup>†</sup> (I+II vs. III+IV) | 1.440               | 1.065-1.948  | <b>0.018</b>      | 1.290                 | 0.928-1.793  | 0.130             |
| Tumour multiplicity (single vs multiple)       | 2.142               | 1.632-2.812  | <b>&lt; 0.001</b> | 1.521                 | 1.008-2.295  | <b>0.046</b>      |
| Tumour size, cm ( $\leq 5$ vs. $> 5$ )         | 1.680               | 1.286-2.194  | <b>&lt; 0.001</b> | 1.446                 | 1.074-1.948  | <b>0.015</b>      |
| Vascular invasion (absent vs. present)         | 5.697               | 4.093-7.902  | <b>&lt; 0.001</b> | 3.861                 | 2.519-5.918  | <b>&lt; 0.001</b> |
| BCLC (A vs. B+C)                               | 3.018               | 2.321-3.925  | <b>&lt; 0.001</b> | 1.077                 | 0.595-1.948  | 0.807             |
| TNM stage (I+II vs. III+IV)                    | 3.081               | 2.364-4.016  | <b>&lt; 0.001</b> | 1.662                 | 0.273-10.126 | 0.582             |
| T                                              | 0.584               | 0.511-0.667  | <b>&lt; 0.001</b> | 0.756                 | 0.133-4.296  | 0.752             |
| N                                              | 4.213               | 1.862-9.530  | <b>0.001</b>      | 3.270                 | 0.895-11.956 | 0.073             |
| M                                              | 6.036               | 1.927-18.909 | <b>0.002</b>      | 2.270                 | 0.318-16.182 | 0.413             |
| CD169 <sub>T</sub> (low vs. high)              |                     |              |                   |                       |              |                   |
| $\leq 122.2$ cells/field*                      | 0.424               | 0.322-0.559  | <b>&lt; 0.001</b> | 0.493                 | 0.364-0.668  | <b>&lt; 0.001</b> |
| $> 122.2$ cells/field*                         |                     |              |                   |                       |              |                   |
| CD8 <sub>T</sub> (low vs. high)                |                     |              |                   |                       |              |                   |
| $\leq 150$ cells/field*                        | 0.616               | 0.474-0.802  | <b>&lt; 0.001</b> | 0.744                 | 0.558-0.993  | <b>0.045</b>      |
| $> 150$ cells/field*                           |                     |              |                   |                       |              |                   |

\*Each number represents mean value/field of all cases analysed.

Univariate analysis, Cox proportional hazards regression model.

Multivariate analysis, Cox proportional hazards regression model. Variables were adopted by univariate analysis.

Abbreviations: OS, overall survival; DFS, disease-free survival; HR, hazard ratio; CI, confidence interval. N.S., not significant.

<sup>†</sup>Data was missing in these variables for some patients. P values ( $< 0.05$ ) are shown in bold.

**Supplementary Table 3.** The definition of gene signatures related with inflamed-cancer

| Name                    | Description                                                                                                                                                                                                                                                                                                     |
|-------------------------|-----------------------------------------------------------------------------------------------------------------------------------------------------------------------------------------------------------------------------------------------------------------------------------------------------------------|
| TIDE                    | Tumor Immune Dysfunction and Exclusion (TIDE) identified factors that underlie these two mechanisms of tumor immune escape. TIDE integrated and modeled data from 189 human cancer studies, comprising a total of 33,197 samples. In totally, there are 23 negative hits.                                       |
| T cell accumulation     | In-vivo shRNA screen in mouse T cells to identify genes whose knockdown can increase the efficiency of T-cell accumulation in tumors. The top 17 hits are defined as genes with a median fold change greater than 2 in the primary screen and larger than one in the validation screen.                         |
| T cell exhaustion       | Gene expression difference between exhausted CD8 T cells and activated CD8 T cells in a mouse model. The negative hits are defined as the bottom 50 genes ranked by the logFC of differential expression.                                                                                                       |
| T cell regulatory       | Gene expression change of CD4 regulatory T cells before and after activation. The negative hits are defined as the bottom 50 genes ranked by the logFC of differential gene expression.                                                                                                                         |
| ICB resist              | Gene expression difference between anti-CTLA4 resistant mouse tumors and parental sensitive B16 tumors. The negative hits are defined as the bottom 50 genes ranked by the logFC of differential expression.                                                                                                    |
| T cell exhaustion fixed | Gene expression features of exhausted CD8 T cells at different stages. For each time point, we computed a logFC vector testing the gene expression difference between exhausted T cells and naïve T cells. The negative hits are defined as the bottom 50 genes ranked by the logFC of differential expression. |
| MDSC                    | Gene expression profiles of myeloid derived suppressor cells that can inhibit T-cell activation compared to monocytes sorted from peripheral blood mononuclear cells. The negative hits are defined as the bottom 50 genes ranked by the logFC of differential expression.                                      |
| TAM M2/M1               | Gene expression profile of M2 macrophages compared to M1 macrophages. The negative hits are defined as the bottom 50 genes ranked by the logFC of differential expression.                                                                                                                                      |
| CAF                     | Gene expression profile of FAP <sup>+</sup> cancer-associated fibroblasts compared to other cell types sorted from the same patients. The negative hits are defined as the bottom 50 genes ranked by the logFC of differential expression.                                                                      |
